# Supplementary material
Source: PubMed Central journal article supplement (PMC5302110)

**ONLINE SUPPLEMENTAL FILE:****Systematic Review of Clinical Practice Guidelines for Failed Antidepressant Treatment Response in Major Depressive Disorder, Dysthymia, and Subthreshold Depression**

Glenda MacQueen MD, PhD<sup>1</sup>, P. Lina Santaguida PT, PhD<sup>2</sup>, Homa Keshavarz RN, PhD<sup>2</sup>, Natalia Jaworska PhD<sup>3</sup>, Mitchell Levine MD, MSc<sup>2</sup>, Joseph Beyene PhD<sup>2</sup>, Parminder Raina PhD<sup>2</sup>

**Online Appendix A. Grey Literature Website Searches**

- 1) Health technology assessment agencies (Hayes Inc. Health Technology Assessment & Consulting),
- 2) regulatory agencies (United States Food and Drug Administration),
- 3) Health Canada, Authorized Medicines for European Community],
- 4) Clinical trial registries (ClinicalTrials.gov, Current Controlled Clinical Trials, Clinical Study Results, WHO Clinical Trials),
- 5) Grants and federally-funded research (e.g. National Institute of Health, Health Services Research Projects in Progress),
- 6) Abstracts and conference proceedings (Conference Papers Index, Scopus)
- 7) New York Academy of Medicine's Grey Literature Index.
- 8) Additional websites of specialty organizations were searched specifically for CPGs ([www.guideline.gov](http://www.guideline.gov); [www.guidance.nice.org.uk](http://www.guidance.nice.org.uk); [www.sign.ac.uk](http://www.sign.ac.uk); [www.nhmrc.gov.au/guidelines/publications/subject/Mental Health](http://www.nhmrc.gov.au/guidelines/publications/subject/MentalHealth); [www.nzgg.org.nz](http://www.nzgg.org.nz); <http://www.hc-sc.gc.ca/ahc-asc/legislation/guide-ld/index-eng.php>).

**Online Appendix B:  
eFigure 1. Flow of studies to final number of eligible studies**

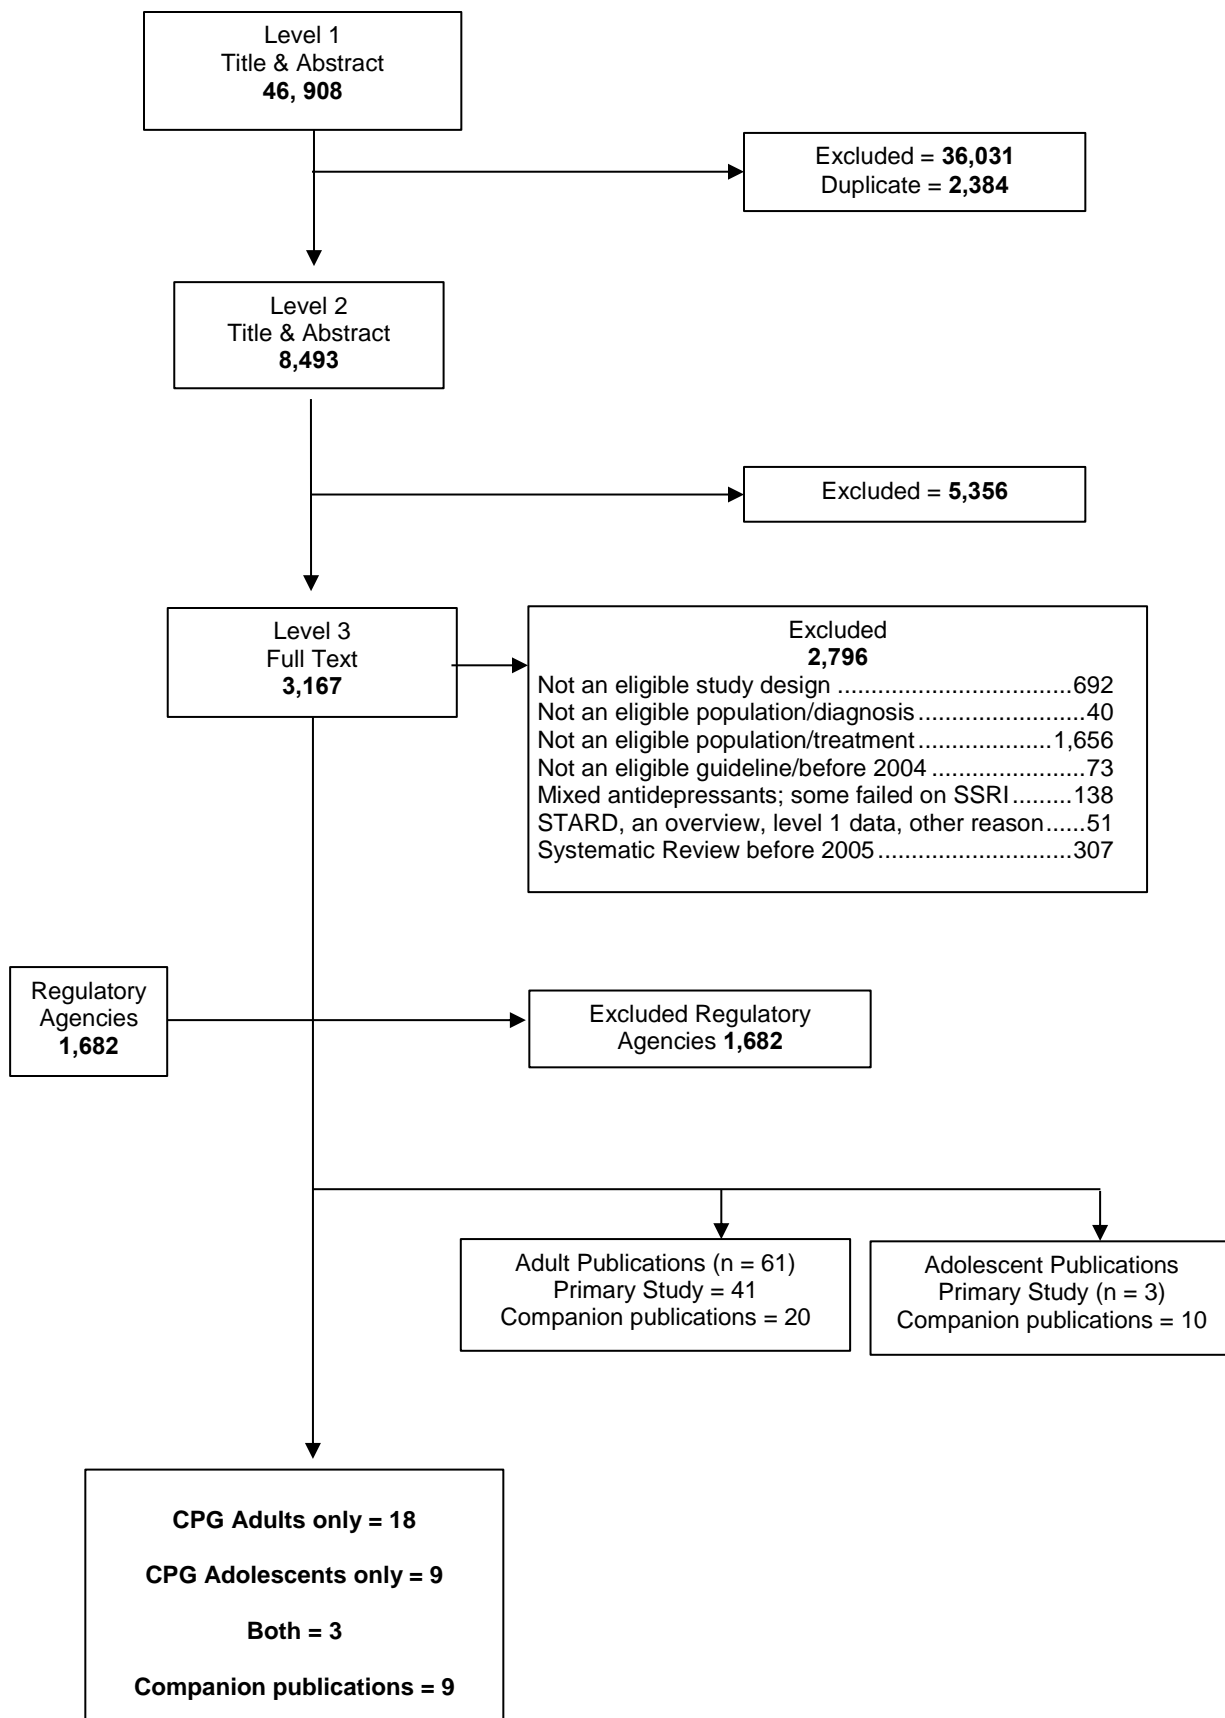

Supplement: DS_10.1177_0706743716664885.pdf [file DS_10.1177_0706743716664885.pdf]
